# Supplementary material
Source: publisher figshare collection journal article supplement (https://acs.figshare.com/ndownloader/files/5914353)
Supplement: Supplementary file 1 [file 5914353]

## Supporting information

### **Ultrathin $\text{Zn}_2(\text{OH})_3\text{VO}_3$ Nanosheets: First Synthesis, Excellent Lithium-Storage Properties and Investigation of Electrochemical Mechanism**

Gongzheng Yang, Mingmei Wu and Chengxin Wang\*

State Key Laboratory of Optoelectronic Materials and Technologies, School of Materials Science and Engineering, Sun Yat-sen (Zhongshan) University, Guangzhou 510275, People's Republic of China

\*Correspondence and requests for materials should be addressed to C. X. Wang.  
Tel & Fax: +86-20-84113901, E-mail: wchengx@mail.sysu.edu.cn

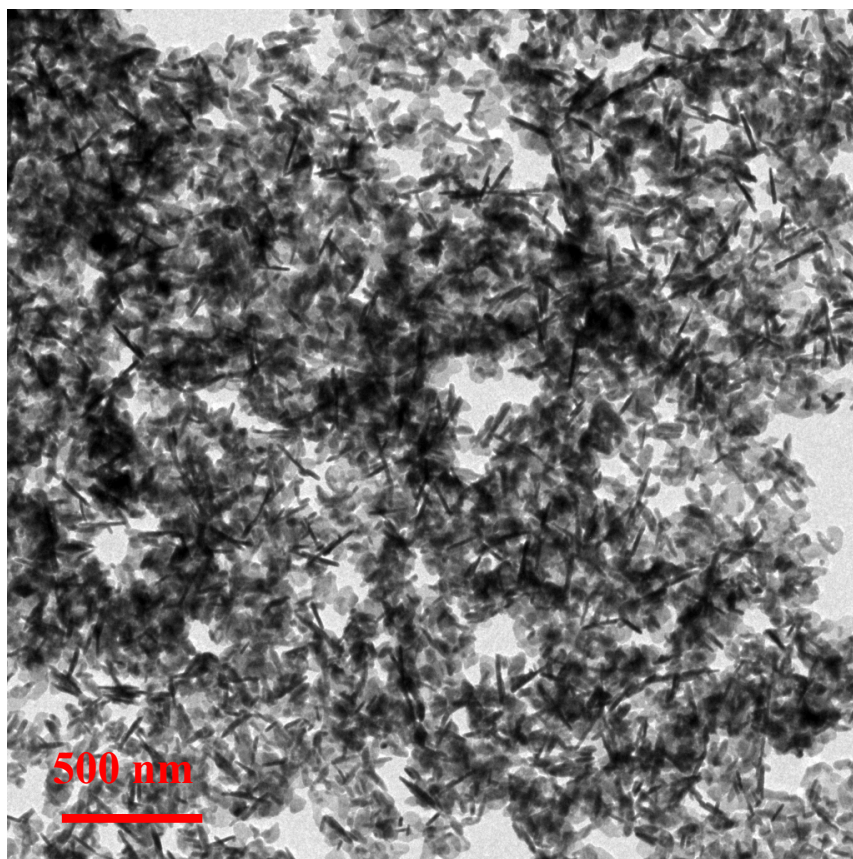

**Figure S1.** Low-magnification TEM image of the Zn<sub>2</sub>(OH)<sub>3</sub>VO<sub>3</sub> nanosheets.

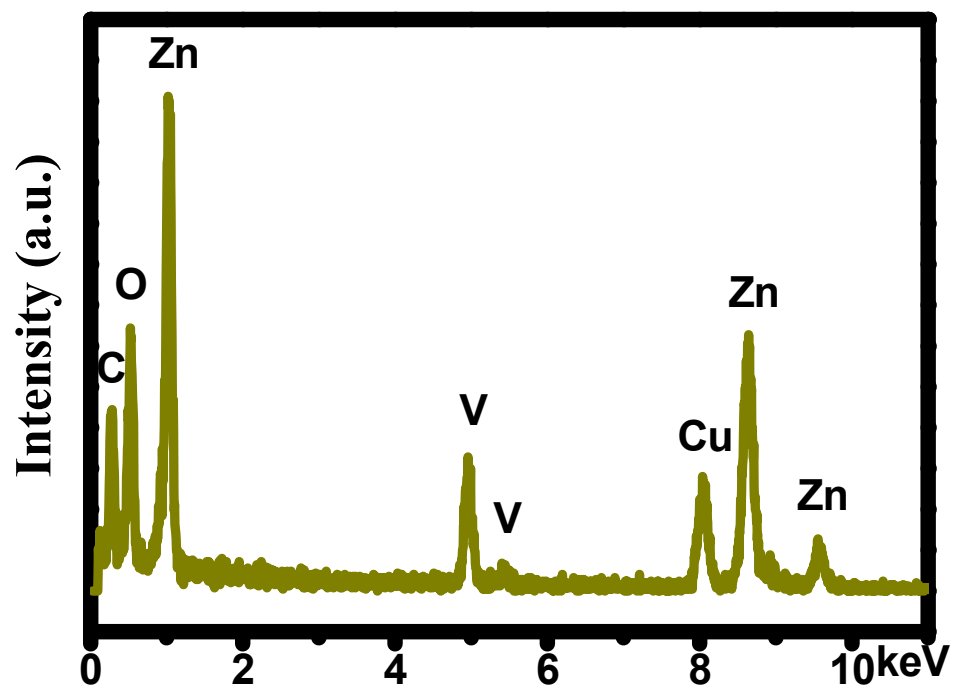

**Figure S2.** EDS spectrum of the  $\text{Zn}_2(\text{OH})_3\text{VO}_3$  nanosheets.

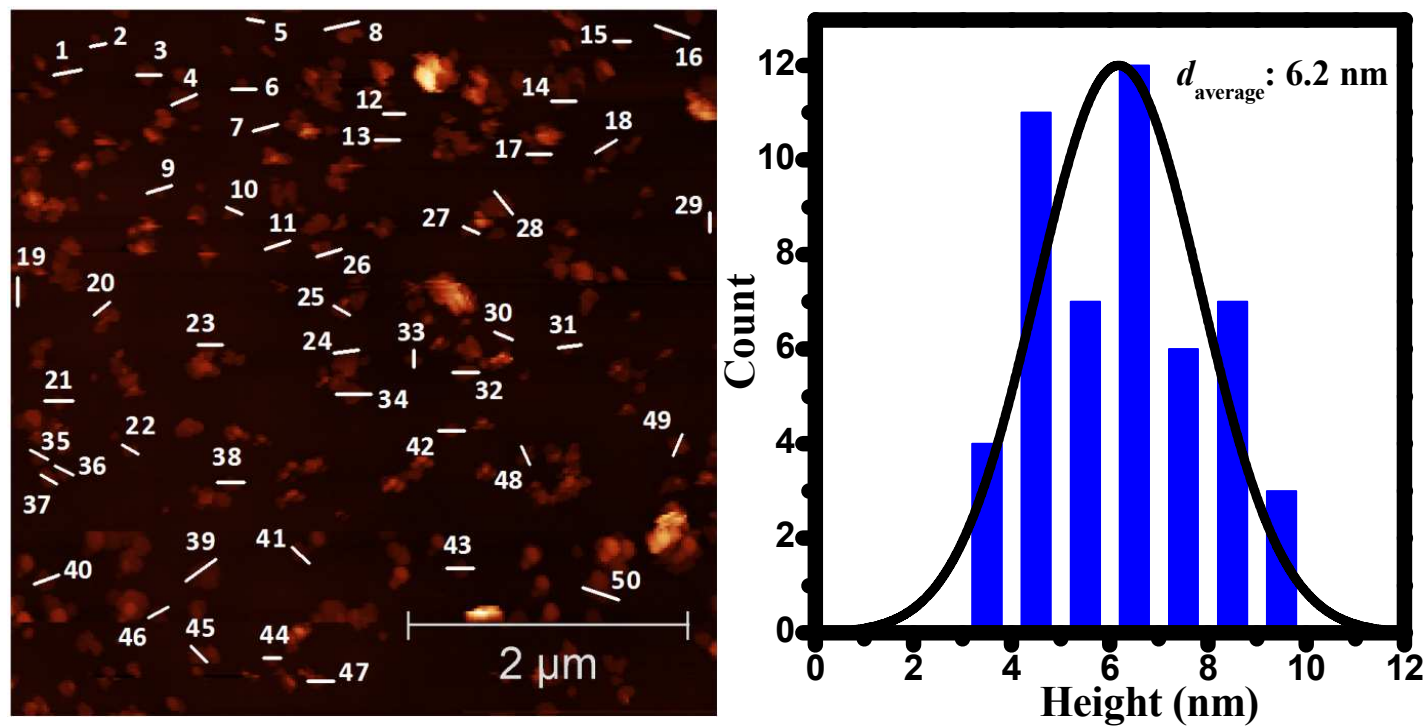

**Figure S3.** AFM image and statistic of the average thickness of the Zn<sub>2</sub>(OH)<sub>3</sub>VO<sub>3</sub> nanosheets.

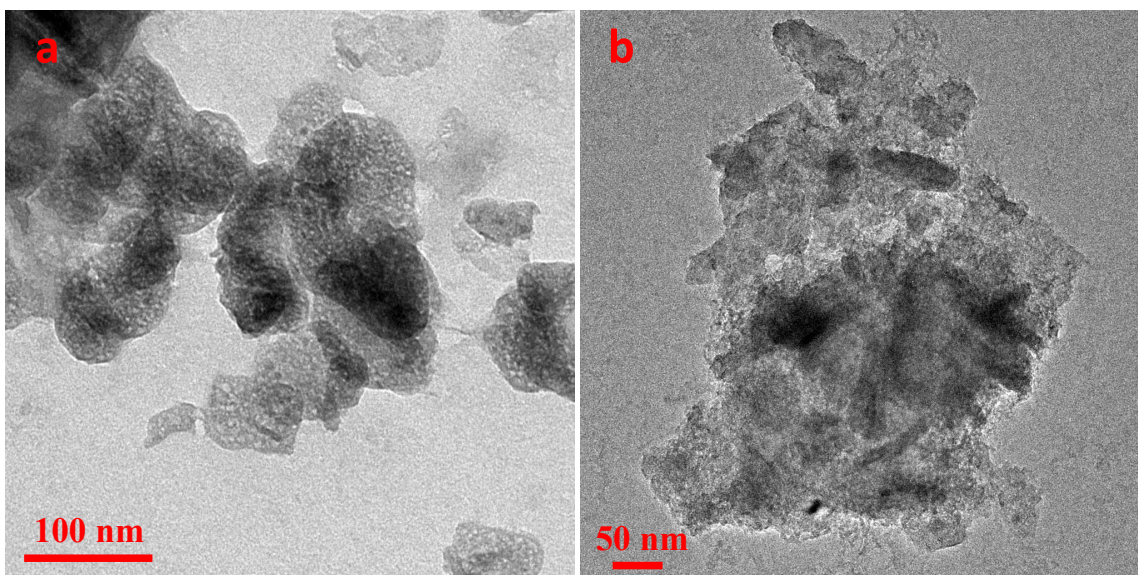

**Figure S4.** Low-magnification TEM images of the Zn<sub>2</sub>(OH)<sub>3</sub>VO<sub>3</sub> nanosheets electrodes obtained after 100 cycles: (a) full-discharge stage; (b) full-charge stage.
